# Supplementary material for: Confining Pt nanoparticles in porous carbon structures for achieving durable electrochemical performance
Source: Royal Society of Chemistry journal article supplement (doi:10.1039/c4nr03555k), 2014-01-01
Supplement: c4nr03555k1.pdf [file c4nr03555k1.pdf]

Supporting Information for

## **Confining Pt Nanoparticles in Mesoporous Carbon**

### **Structure for achieving Durable Electrochemical**

### **Performance**

*Chunzhen Yang,<sup>a,\*</sup> Ming Zhou,<sup>a</sup> Qian Xu<sup>b,\*</sup>*

*<sup>a</sup> CYM Chemistry Building, Department of Chemistry, The University of Hong Kong, Pokfulam Road, Hong Kong S.A.R.*

*Address correspondence to [chunzhenxp@gmail.com](mailto:chunzhenxp@gmail.com)*

*<sup>b</sup> School of Energy and Power Engineering, Jiangsu University, Zhenjiang, P.R. China*

*Address correspondence to [hawkingxq@hotmail.com](mailto:hawkingxq@hotmail.com)*

List of contents:

- Experimental: Synthesis of solid core-mesoporous shell (SCMS) SiO<sub>2</sub> spheres.
- Fig. S1 TEM images of commercial E-TEK Pt/VC catalyst
- Fig. S2 Raman spectroscopy
- Fig. S3 CV curves of the examined Pt catalysts in 0.5 M H<sub>2</sub>SO<sub>4</sub> electrolyte at a scan rate of 20 mV s<sup>-1</sup> and measurement of ECSA
- Fig. S4 CV curves of methanol oxidation reaction of the examined Pt catalysts before and after 2000 cycles of ADTs
- References

## Experimental

### Synthesis of SCMS SiO<sub>2</sub> spheres

A two-step synthesis procedure was used to prepare the solid core-mesoporous shell (SCMS) silica spheres as described in previous work.<sup>1</sup> SiO<sub>2</sub> solid spheres were first prepared by the Stöber method<sup>2</sup> as follows: concentrated ammonium solution (7 ml) was added into a mixture of ethanol (180 ml) and water (14 ml). Then tetraethoxysilicate (TEOS, 10 ml) was added and stirred for 6 hrs. In order to grow the mesoporous silica shell onto the solid silica spheres, a solution of cetyltrimethylammonium bromide (CTAB, 2.4 g) in water (40 ml) and ethanol (20 ml) was added into the above mixture and stirred for 12 hrs. Then TEOS (4.1 ml) was introduced and stirred for another 12 hrs. The above procedure can be repeated for several times to increase the mesoporous shell thickness. Finally, the product was collected by filtration and treated at 500 °C in air for 3 hrs to remove CTAB. Three SCMS silica spheres with the same core diameter (300 nm) and stepwise increased shell thickness (50 nm, 80 nm, and 150 nm) were synthesized using above procedure.

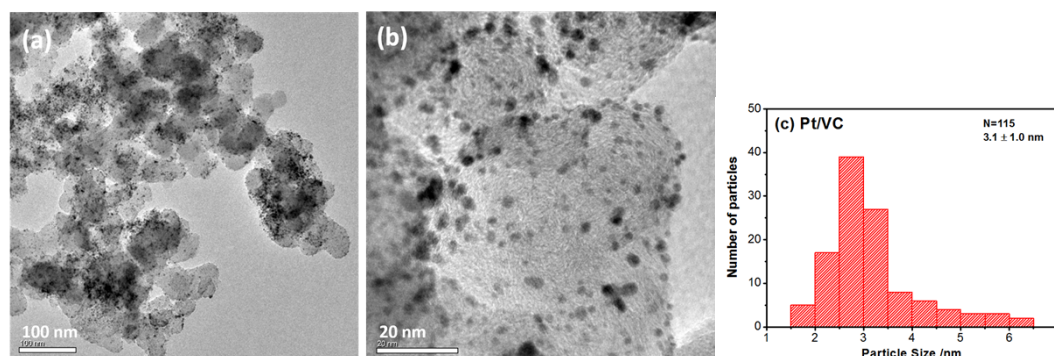

**Fig. S1** (a-b) TEM images of commercial E-TEK Pt/VC catalyst, (c) particle size distribution profile of Pt NPs in the E-TEK Pt/VC catalyst measured from the TEM images.

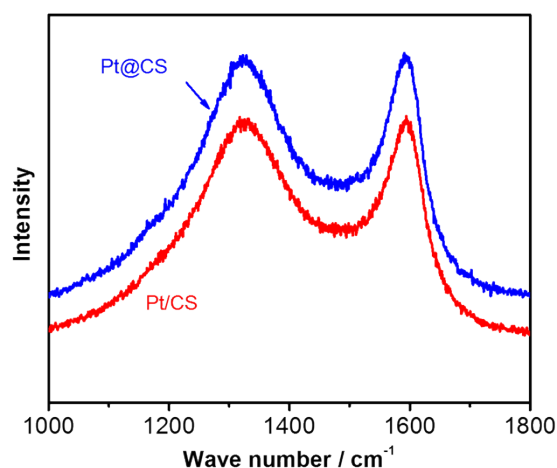

**Fig. S2** Raman spectroscopy of Pt@CS and Pt/CS. Two characteristic peaks at 1340  $\text{cm}^{-1}$  and 1590  $\text{cm}^{-1}$ , corresponding to disordered graphite (D-band) and graphite (G-band) respectively, were observed, indicating the bulk structure of HCMS carbon spheres was composed of two different carbon phases. The intensity ratio between the D-band and G-band ( $I_D/I_G$ ) reflected the ratio of the amorphous to graphitic carbon content. Therefore, both of the Pt@CS and Pt/CS catalysts supported on HCMS carbon spheres exhibited a similar hydrophilic/hydrophobic character of the carbon support.

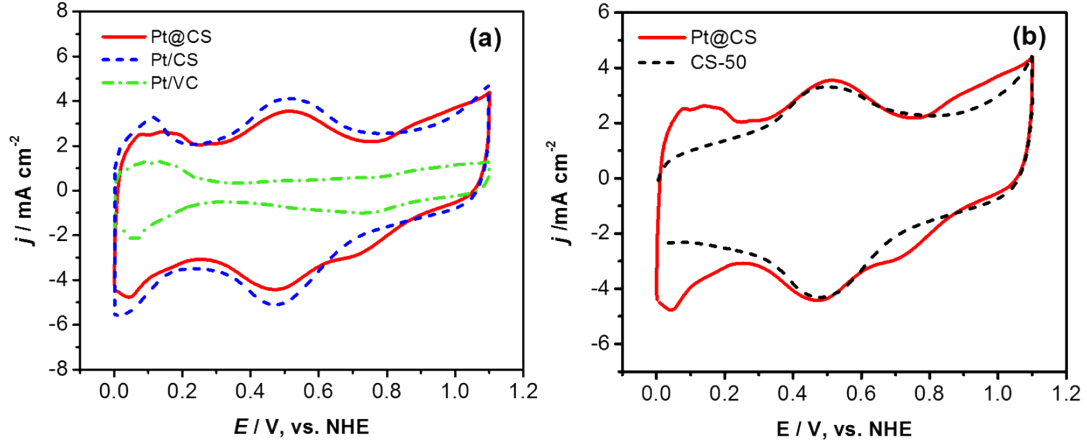

**Figure S3.** (a) Cyclic voltammetry of the examined Pt catalysts in 0.5 M H<sub>2</sub>SO<sub>4</sub> electrolyte at a scan rate of 20 mV s<sup>-1</sup>. (b) CV curves of Pt@CS and carbon spheres (CS-50) in 0.5 M H<sub>2</sub>SO<sub>4</sub> electrolyte at a scan rate of 20 mV s<sup>-1</sup> with equal mass loading of carbon on GC electrodes (0.57 mg cm<sup>-2</sup>). The current was normalized by the electrode surface area.

Cyclic voltammetry of carbon spheres (CS-50) was measured in H<sub>2</sub>SO<sub>4</sub> electrolyte at the same scan rate (20 mV s<sup>-1</sup>) as background. The area under the hydrogen desorption region between 0.05 V and 0.4 V vs. NHE subtracted the background currents contributed from carbon support was integrated as the charge associated with H<sup>+</sup> desorption ( $Q_H$ ).<sup>3-5</sup> The ECSA of Pt was then calculated according to the following equation:

$$\text{ECSA} = \frac{Q_H}{0.21 \times [Pt]}$$

where  $Q_H$  (mC) is the charge due to the hydrogen desorption in the potential region of 0.05 – 0.4 V of the CVs, 210 μC cm<sup>-2</sup> is the electrical charge associated with monolayer adsorption of hydrogen on Pt surface, and [Pt] is the loading of Pt on the working electrode.

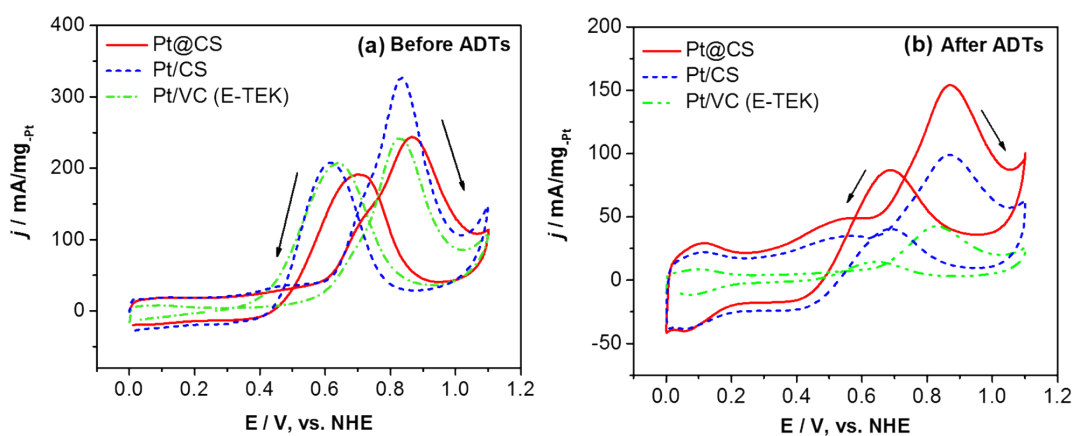

**Fig. S4** (a) CV curves of the Pt@CS, Pt/CS and E-TEK Pt/VC catalysts in 1.0 M CH<sub>3</sub>OH + 0.5 M H<sub>2</sub>SO<sub>4</sub> solution at a scan rate of 20 mV s<sup>-1</sup>. (b) CV curves of the degraded Pt catalysts after 2000 cycles of ADTs in 1.0 M CH<sub>3</sub>OH + 0.5 M H<sub>2</sub>SO<sub>4</sub> solution at a scan rate of 20 mV s<sup>-1</sup>. The current was normalized by Pt mass loaded on the GC electrodes.

## References

1. F. J. Li, M. Morris and K. Y. Chan, *J. Mater. Chem.*, 2011, **21**, 8880-8886.
2. W. Stöber, A. Fink and E. Bohn, *J. Colloid. Interf. Sci.*, 1968, **26**, 62-69.
3. M. Arenz, K. J. J. Mayrhofer, V. Stamenkovic, B. B. Blizanac, T. Tomoyuki, P. N. Ross and N. M. Markovic, *J. Am. Chem. Soc.*, 2005, **127**, 6819-6829.
4. Y. Li, E. Zhu, T. McLouth, C. Y. Chiu, X. Huang and Y. Huang, *J. Am. Chem. Soc.*, 2012, **134**, 12326-12329.
5. F. J. Li, K. Y. Chan and H. Yung, *J. Mater. Chem.*, 2011, **21**, 12139-12144.
